# Supplementary material for: Travelers’ Subjective Well-Being as an Environmental Practice: Do Airport Buildings’ Eco-Design, Brand Engagement, and Brand Experience Matter?
Source: MDPI journal article supplement (doi:10.3390/ijerph20020938), 2023-01-04
Supplement: s1 [file s1]

**Table S1.** The originally developed questionnaire items.

| <b>Domain</b>               | <b>Item Code</b> | <b>Item</b>                                                                                                                                      |
|-----------------------------|------------------|--------------------------------------------------------------------------------------------------------------------------------------------------|
| Demographic characteristics | Dem_01           | Gender                                                                                                                                           |
|                             | Dem_02           | Age                                                                                                                                              |
|                             | Dem_03           | Marital status                                                                                                                                   |
|                             | Dem_04           | Child                                                                                                                                            |
|                             | Dem_05           | Education                                                                                                                                        |
|                             | Dem_06           | Monthly income                                                                                                                                   |
| Eco-design of airports      | Eco_01           | Eco spaces are readily available at this airport (ECO SPACES)                                                                                    |
|                             | Eco_02           | Rest areas at this airport are designed in a green way (GREEN REST AREAS)                                                                        |
|                             | Eco_03           | Diverse flowers/trees and potted plants are located in many places (e.g., cafés, restaurants, shopping places) at this airport (PLANTS)          |
|                             | Eco_04           | A variety of green interior decorations are easily observable at this airport ECO FRIENDLY DÉCOR)                                                |
|                             | Eco_05           | Natural light through glass windows, walls, and roofs are easily observable at this airport (natural light)                                      |
|                             | Eco_06           | Air quality at this airport (e.g., temperature, circulation, humidity, natural scent, and ventilation) is fresh and comfortable (air freshness). |
|                             | Eco_07           | Overall physical environment of this airport is designed in an eco-friendly way (eco-friendly physical environment).                             |
| Brand engagement            | Eng_01           | I have posted pictures/graphics related to this airport                                                                                          |
|                             | Eng_02           | I have shared/commented on the airport related posts                                                                                             |
|                             | Eng_03           | I have said positive things about this airport and its eco-design to others                                                                      |
|                             | Eng_04           | I will encourage friends and relatives to use airport in the future                                                                              |
|                             | Eng_05           | I will make constructive suggestions to the airport about how to improve its eco design                                                          |
|                             | Eng_06           | I will let the airport know of ways that can better serve my needs to eco                                                                        |
|                             | Eng_07           | I would contact the airport if its eco were continually below expectations                                                                       |
|                             | Eng_08           | I would post negative comments if the airport's eco continued to be below expectations                                                           |
| Brand experience            | Exp_01           | I find the eco-design interesting in a sensory way                                                                                               |
| Subjective well-being       | Well_01          | I feel healthy and happy when staying at this airport                                                                                            |
|                             | Well_02          | I feel emotional well-being while staying at this airport                                                                                        |

**Table S2.** Results of the bootstrap heterotrait-monotrait (HTMT) ratio of correlations.

| <b>Parameter</b> | <b>T stat</b> | <b>Bootstrap Mean</b> | <b>95% CI</b> |
|------------------|---------------|-----------------------|---------------|
| Eco → Eng        | 39.46         | 0.88                  | 0.84 to 0.91  |
| Eco → Exp        | 17.78         | 0.70                  | 0.63 to 0.76  |
| Eco → Eco × Exp  | 2.86          | 0.12                  | 0.08 to 0.18  |
| Eco → Well       | 12.15         | 0.67                  | 0.58 to 0.76  |
| Eng → Exp        | 30.46         | 0.80                  | 0.76 to 0.85  |
| Eng → Eco × Exp  | 2.55          | 0.14                  | 0.08 to 0.22  |
| Eng → Well       | 12.93         | 0.67                  | 0.58 to 0.75  |
| Exp → Eco × Exp  | 1.77          | 0.09                  | 0.04 to 0.17  |
| Exp → Well       | 10.96         | 0.59                  | 0.49 to 0.67  |
| Eco × Exp → Well | 2.20          | 0.10                  | 0.05 to 0.15  |
